# Supplementary material for: Synergistic coupling of FeOOH with Mo-incorporated NiCo LDH towards enhancing the oxygen evolution reaction
Source: Royal Society of Chemistry journal article supplement (doi:10.1039/d2nj00867j), 2022-01-01
Supplement: d2nj00867j1.pdf [file d2nj00867j1.pdf]

## Supporting Information

### **Synergistic coupling of FeOOH with Mo-incorporated NiCo LDH towards enhancing the oxygen evolution reaction**

Hang Luo<sup>a,b</sup>, Jin Liang<sup>a,b\*</sup>, Jialin Zhou<sup>b</sup>, Zhao Yin<sup>a,b</sup>, Ziyi Zhang<sup>b</sup>, Xiubo Liu<sup>a,b</sup>

<sup>a</sup>*Hunan Province Key Laboratory of Materials Surface & Interface Science and Technology*, <sup>b</sup>*College of Material Science and Engineering, Central South University of Forestry and Technology, Changsha 410004, P. R. China.*

\*Corresponding author: [lfcstu@163.com](mailto:lfcstu@163.com)

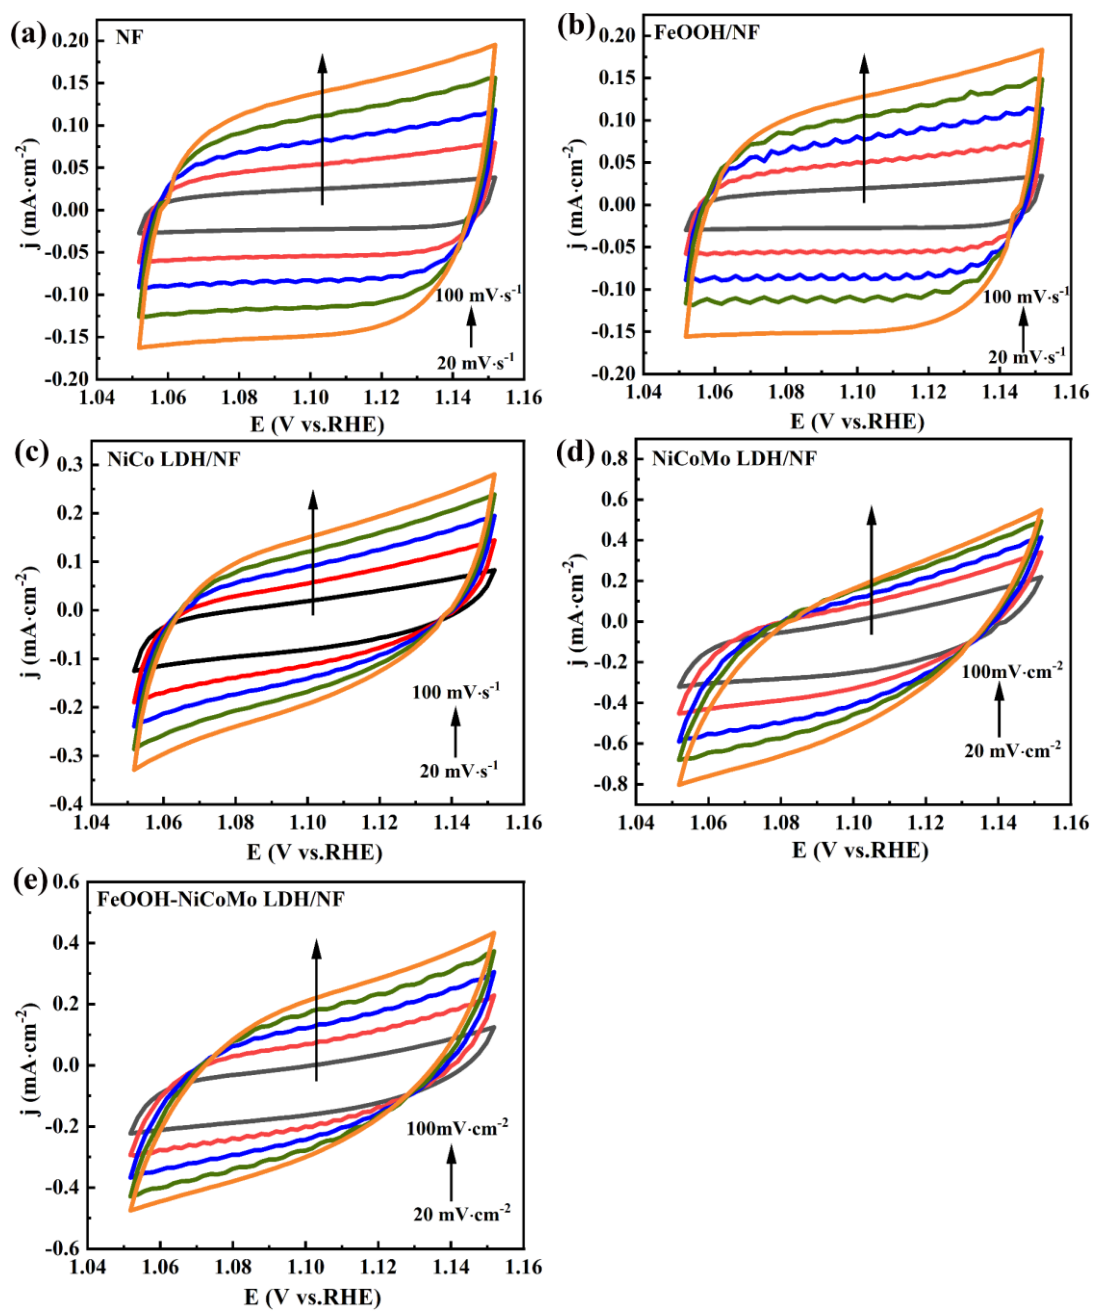

**Fig. S1** The CV curves of (a) NF, (b) FeOOH/NF, (c) NiCo LDH/NF, (d) NiCoMo LDH/NF, (e) FeOOH-NiCoMo LDH/NF.

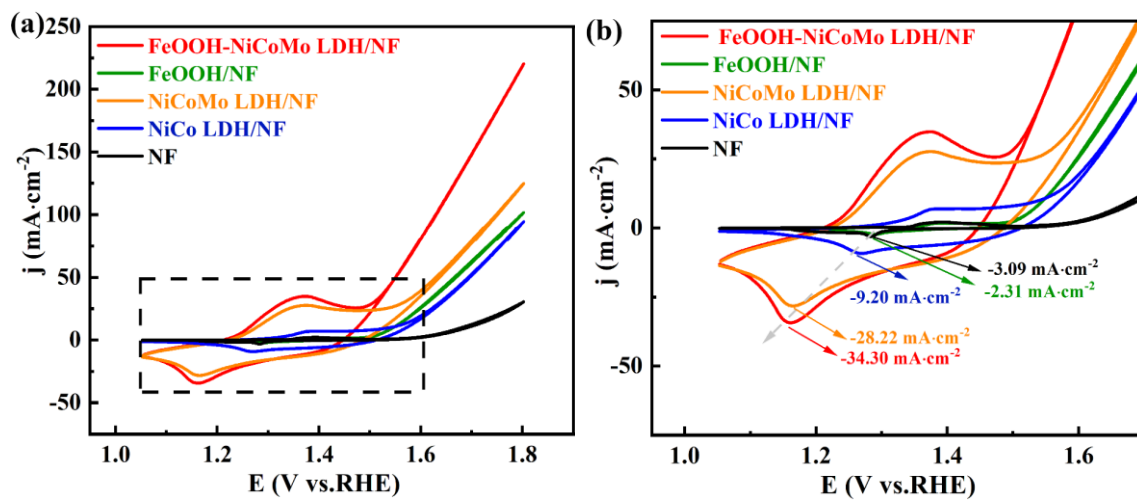

**Fig. S2** (a) CV of samples at a scan rate of  $5 \text{ mV} \cdot \text{s}^{-1}$  without  $iR$  compensation in  $1.0 \text{ mol/L KOH}$ ,  
 (b) Partial enlargement of CV.

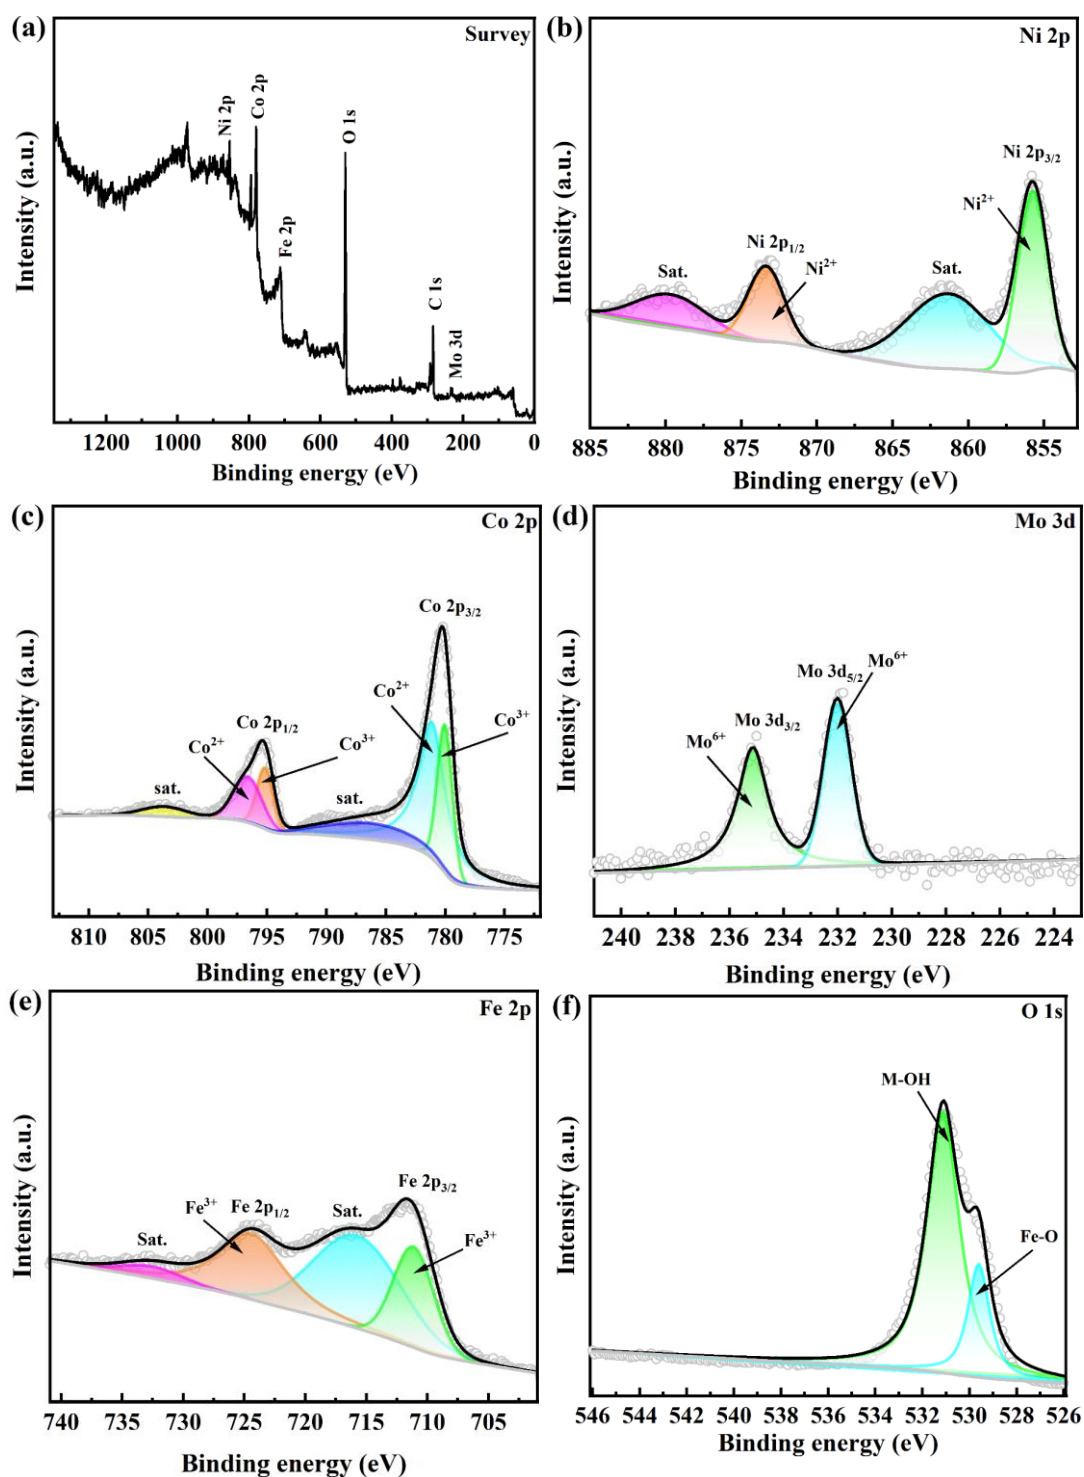

**Fig. S3** XPS spectra of FeOOH-NiCoMo LDH/NF. (a) XPS survey spectrum, (b) Ni 2p, (c) Co 2p, (d) Mo 3d, (e) Fe 2p, (f) O 1s XPS high resolution spectrum of FeOOH-NiCoMo LDH/NF after long-term stability test in 1.0 M KOH.

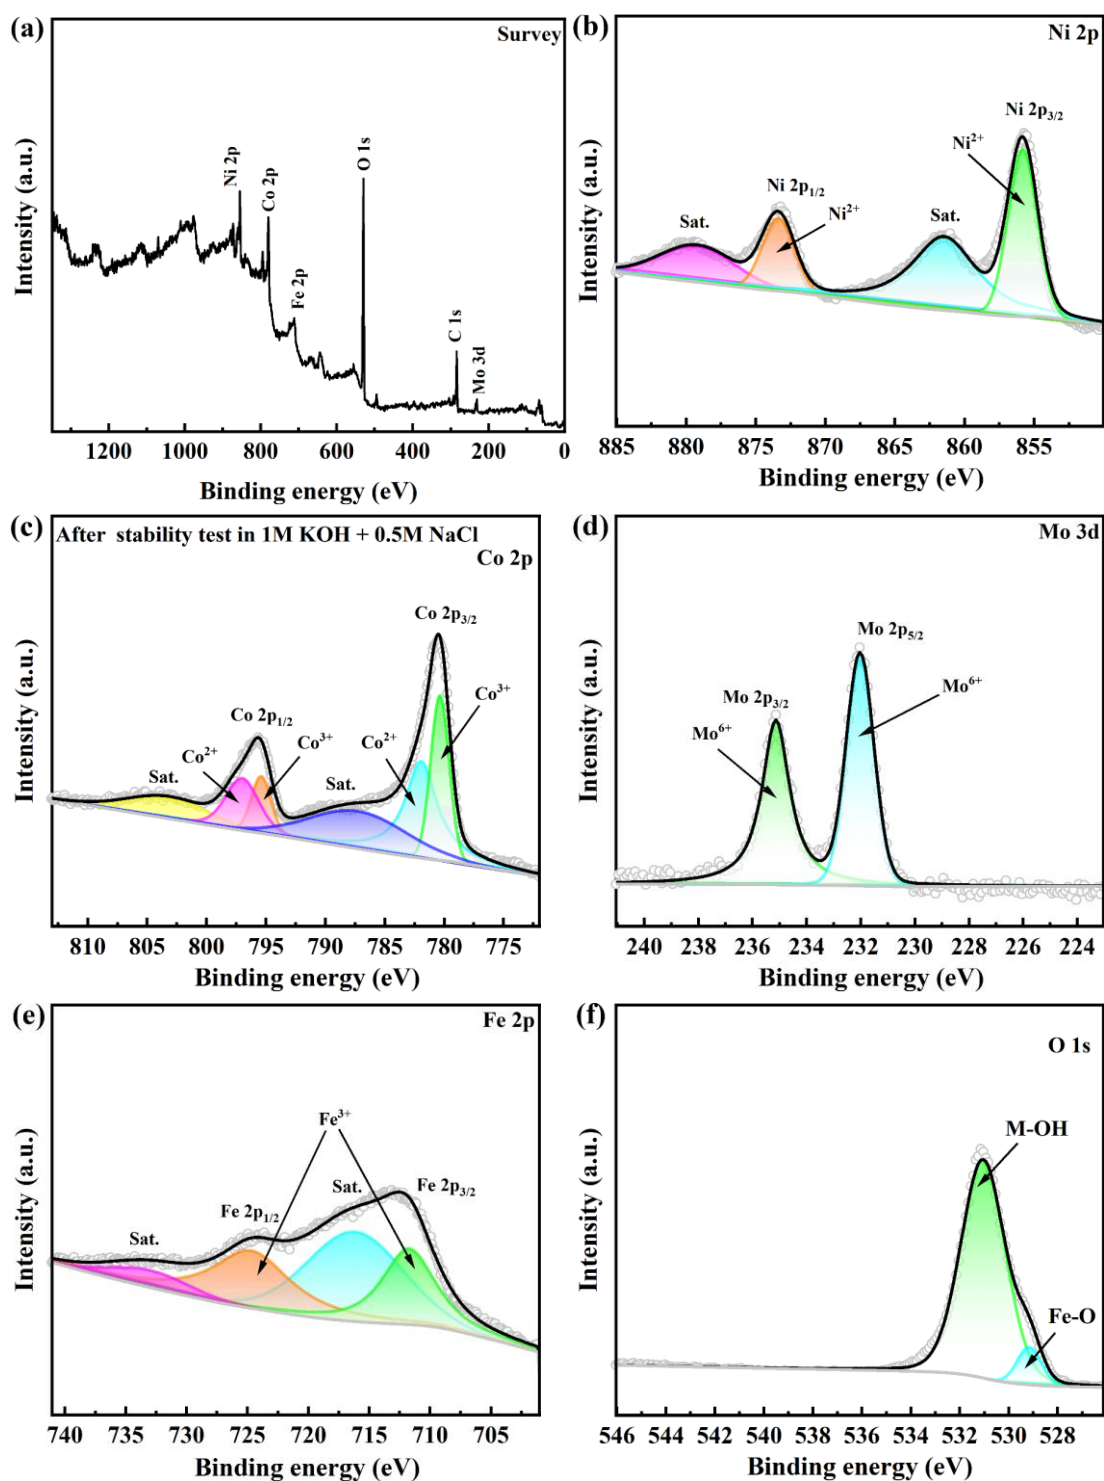

**Fig. S4** XPS spectra of FeOOH-NiCoMo LDH/NF. (a) XPS survey spectrum, (b) Ni 2p, (c) Co 2p, (d) Mo 3d, (e) Fe 2p, (f) O 1s XPS high resolution spectrum of FeOOH-NiCoMo LDH/NF after stability test in 1.0 M KOH and 0.5 M NaCl aqueous solution.

**Table. S1** Comparison of the electrocatalytic activity of FeOOH-NiCoMo LDH/NF electrocatalysts with several catalysts have been reported recently ( $\eta_j$ : Overpotential at the applied current density;  $j$ : Current density)

| Catalyst                                  | medium   | $\eta_j$ /mV   | $j$ /mA·cm <sup>-2</sup> | Reference |
|-------------------------------------------|----------|----------------|--------------------------|-----------|
| FeOOH-                                    | alkaline | 256            | 50                       | Our work  |
| NiCoMo LDH/NF                             |          | 275            | 100                      |           |
| NiCo LDH/ZnCo <sub>2</sub> O <sub>4</sub> | alkaline | 260            | 10                       | 1         |
| Co/NCP@NiCo LDHs                          | alkaline | 277            | 10                       | 2         |
| CoNiN@NiFe LDH                            | alkaline | 227            | 10                       | 3         |
| NiSe@CoFe LDH                             | alkaline | 203            | 10                       | 4         |
| NiFeCr LDH/MoS <sub>2</sub>               | alkaline | 1.50 (vs. RHE) | 10                       | 5         |
| NiFe LDH@Mo-NiS-NiS <sub>2</sub>          | alkaline | 261            | 50                       | 6         |
| CoFeMo LDH                                | alkaline | 240            | 100                      | 7         |
|                                           |          | 350            | 500                      |           |
| FeOOH@CC                                  | alkaline | 257.8          | 50                       | 8         |
| FeOOH/CoP                                 | alkaline | 250            | 10                       | 9         |

**Table. S2** Summary of EIS fitting results for oxygen evolution reaction

| Catalysts           | $R_{ct}$ ( $\Omega$ ) | $R_s$ ( $\Omega$ ) |
|---------------------|-----------------------|--------------------|
| FeOOH-NiCoMo LDH/NF | 0.675                 | 1.096              |
| NF                  | 187.9                 | 1.996              |
| FeOOH/NF            | 16.16                 | 1.482              |
| NiCo LDH/NF         | 46.32                 | 1.514              |
| NiCoMo LDH/NF       | 4.994                 | 1.372              |

## Reference

1. M. Shamloofard, S. Shahrokhian and M. K. Amini, *Journal of Colloid and Interface Science*, 2021, **604**, 832-843.
2. Z. Chen, Y. Zhang, P. Yang, W. Xiong, X. Ren, Y. Li, L. Wang, S. Ye, J. Liu and Q. Zhang, *Journal of Alloys and Compounds*, 2022, **890**, 161805.
3. J. Wang, G. Lv and C. Wang, *Applied Surface Science*, 2021, **570**, 151182.
4. F. Nie, Z. Li, X. Dai, X. Yin, Y. Gan, Z. Yang, B. Wu, Z. Ren, Y. Cao and W. Song, *Chemical Engineering Journal*, 2022, **431**, 134080.
5. S. Chen, C. Yu, Z. Cao, X. Huang, S. Wang and H. Zhong, *International Journal of Hydrogen Energy*, 2021, **46**, 7037-7046.
6. Y. Li, T. Dai, Q. Wu, X. Lang, L. Zhao and Q. Jiang, *Materials Today Energy*, 2022, **23**, 100906.
7. Y. Ding, X. Du and X. Zhang, *Dalton Transaction*, 2020, **49**, 15417-15424.
8. W. Tang, G. Zhang and Y. Qiu, *International Journal of Hydrogen Energy*, 2020, **45**, 28566-28575.
9. J. Cheng, B. Shen, Y. Song, J. Liu, Q. Ye, M. Mao and Y. Cheng, *Chemical Engineering Journal*, 2022, **428**, 131130.
